# Supplementary material for: Permselectivity and thickness-dependent ion transport properties of overoxidized polyaniline: a mechanistic investigation
Source: Royal Society of Chemistry journal article supplement (doi:10.1039/c6cp04975c), 2016-01-01
Supplement: c6cp04975c1.pdf [file c6cp04975c1.pdf]

**Supporting Information**

**For**

**Permselectivity and Thickness-Dependent Ion Transport Properties of Overoxidized  
Polyaniline: A Mechanistic Investigation**

Subrata Mondal and M. V. Sangaranarayanan\*

Department of Chemistry, Indian Institute of Technology Madras-Chennai 600 036 India

Email: [sangara@iitm.ac.in](mailto:sangara@iitm.ac.in), Tel: +9144-22574209; Fax: +9144-22570545

## FTIR studies

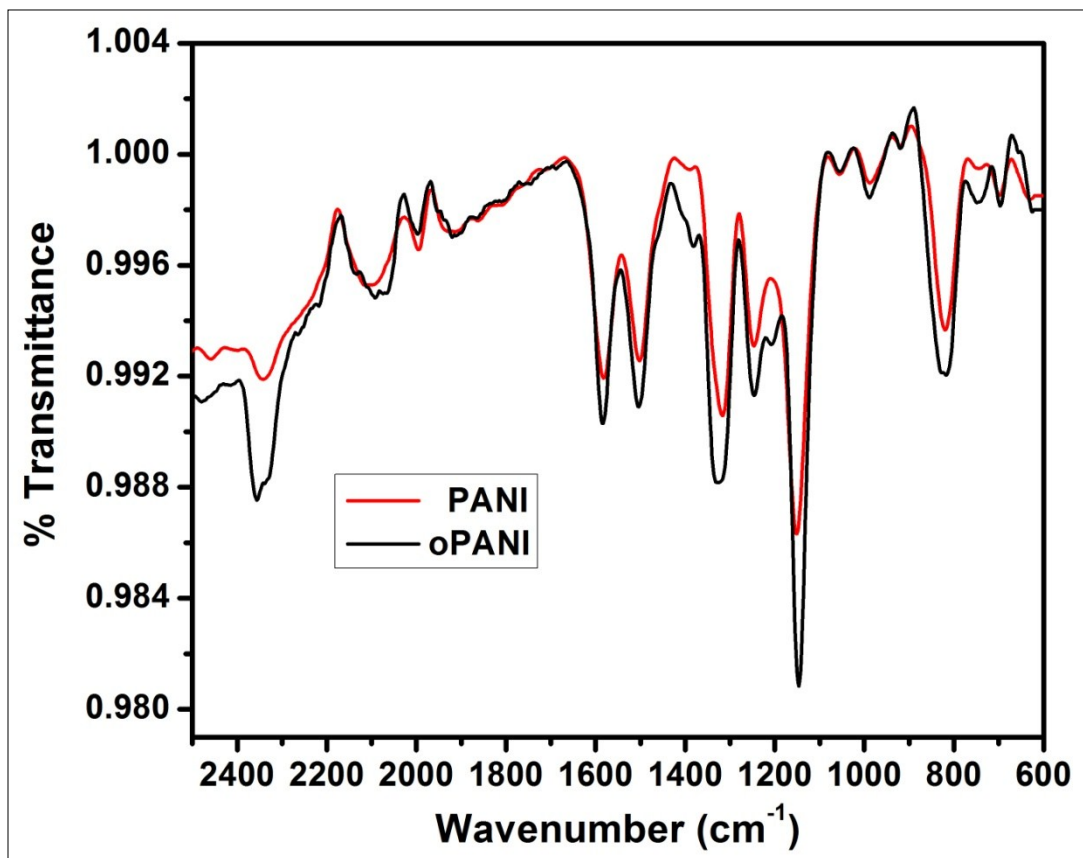

Fig. S1 FTIR spectra of PANI and oPANI on ITO electrode surface.

## EDAX studies

### PANI

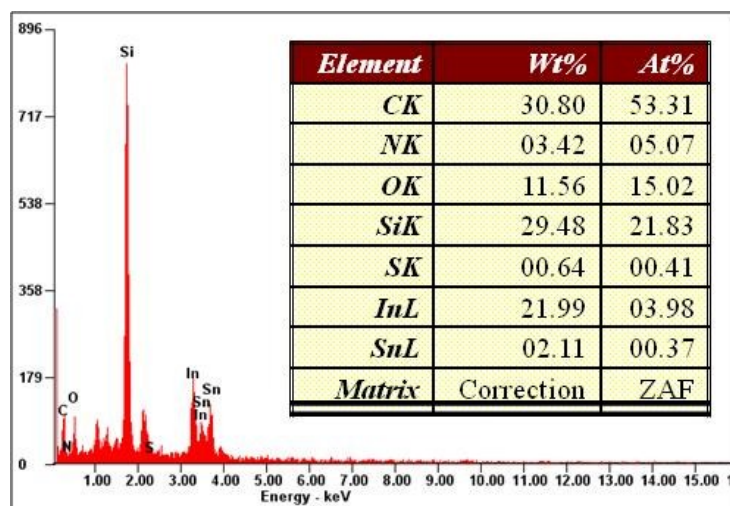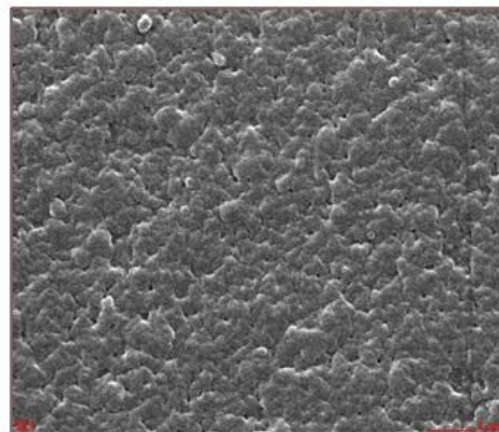

### oPANI

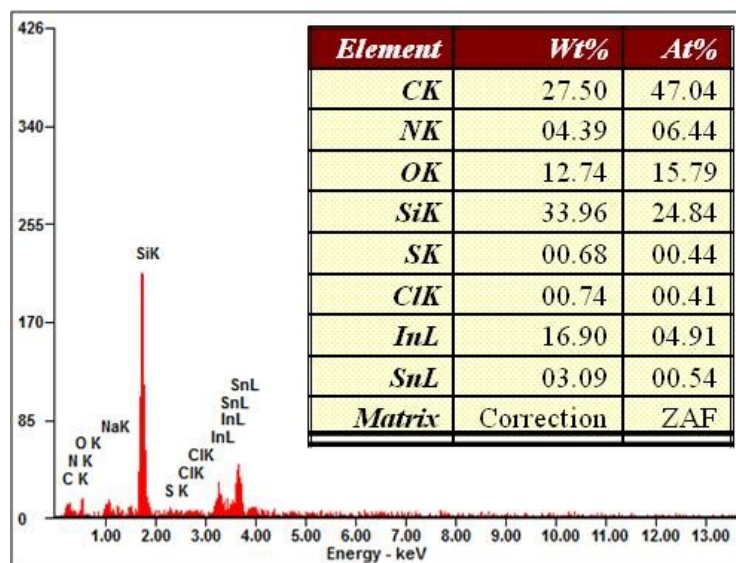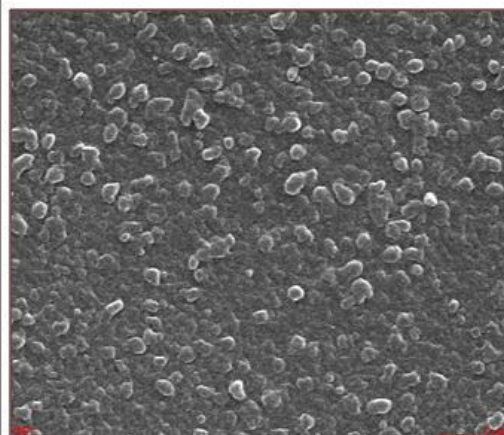

Fig. S2 EDAX spectra of PANI and oPANI on ITO electrode.

### Cyclic Voltammetric studies

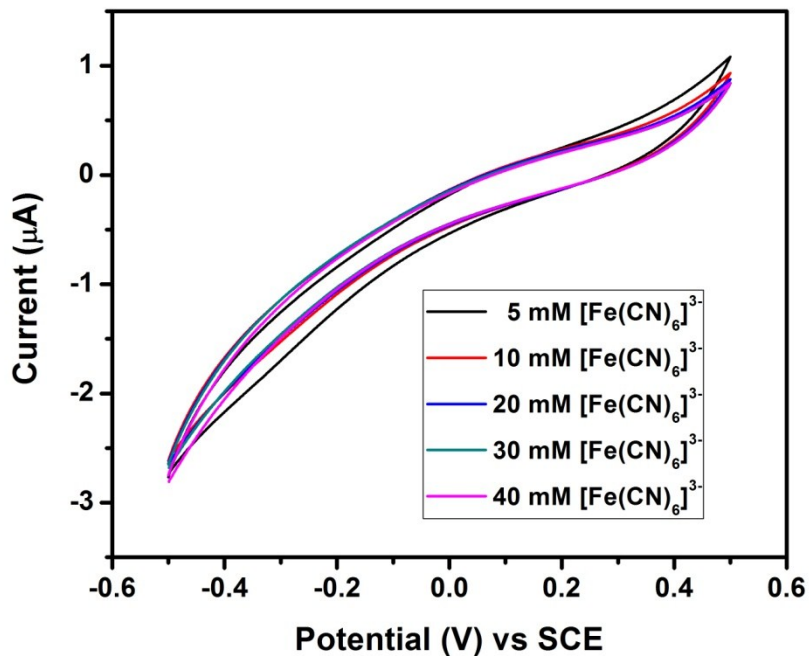

**Fig. S3** Cyclic Voltammetric response of the oPANI/GC electrode at different concentrations of  $[\text{Fe}(\text{CN})_6]^{3-}$ .

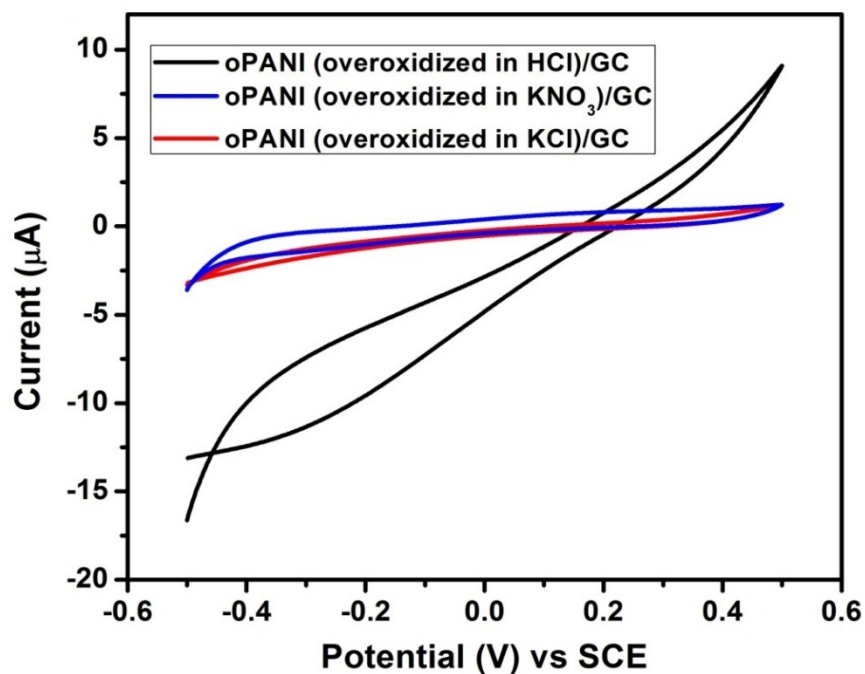

**Fig. S4** Cyclic voltammograms of oPANI/GC electrode towards  $[\text{Fe}(\text{CN})_6]^{3-}$  when the overoxidation was performed in different electrolytes.

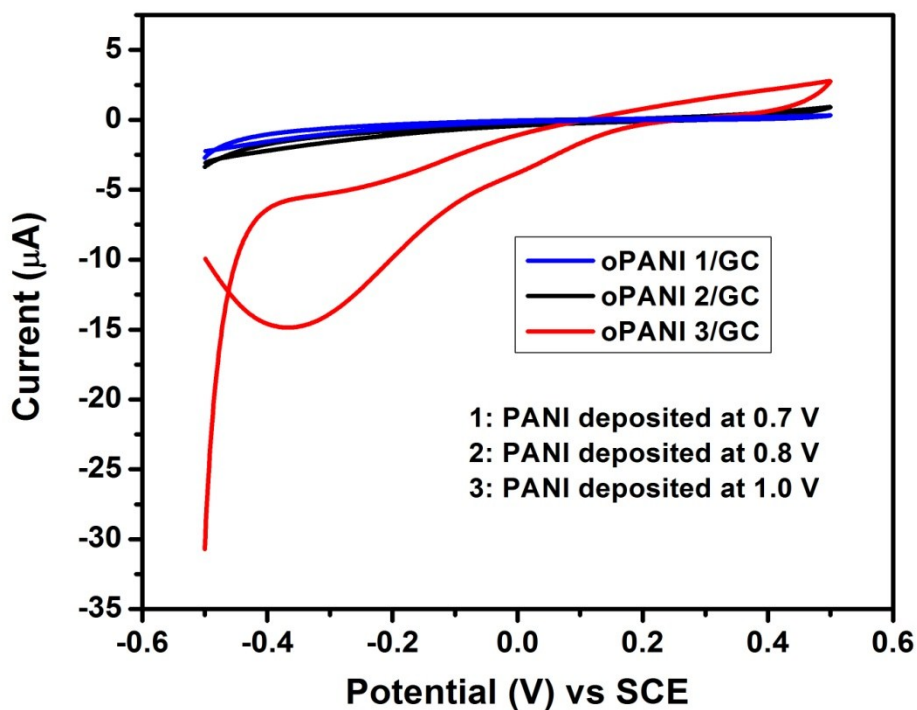

**Fig. S5** Cyclic voltammograms of oPANI/GC electrode towards  $[\text{Fe}(\text{CN})_6]^{3-}$  when the deposition of PANI was carried out at different potentials.

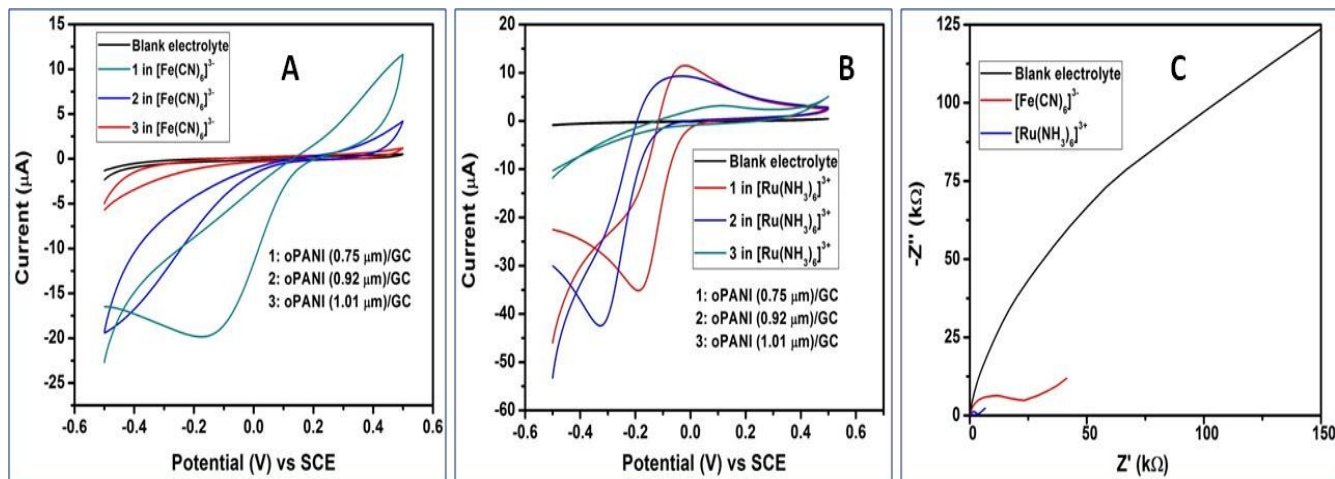

**Fig. S6** Comparison of the cyclic voltammetric response of oPANI/GC electrode in blank solution (0.1 M KCl) and in presence of redox probe (A and B). (C) Nyquist plots of oPANI/GC in blank solution (0.1 M KCl) and in presence of redox probe.

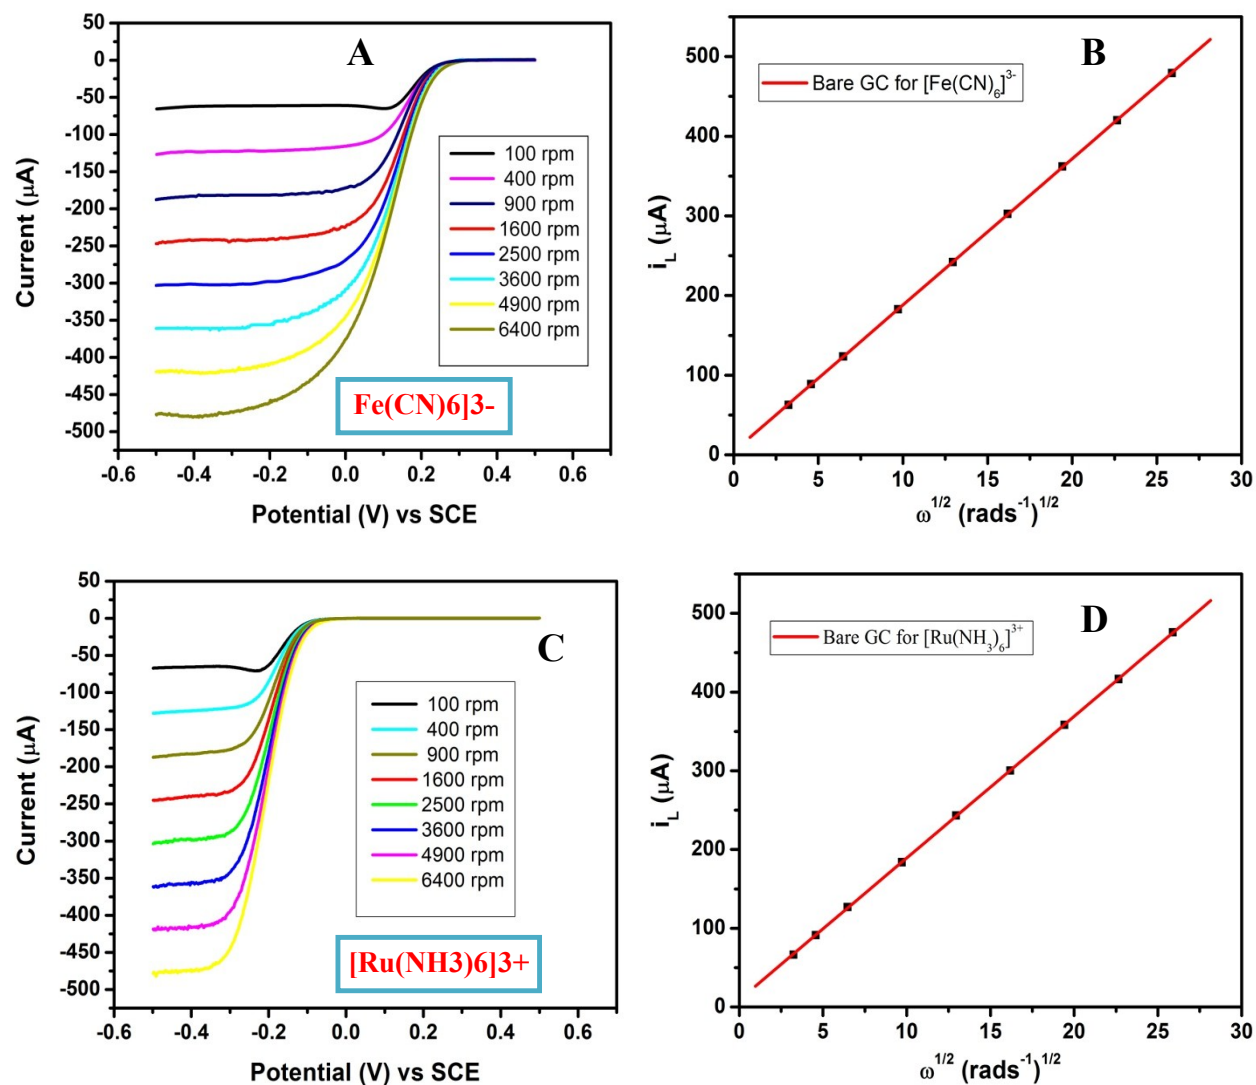

**Fig. S7** Linear Sweep Voltammograms of the bare GC electrode in 0.1 M KCl solution for (A)  $[\text{Fe}(\text{CN})_6]^{3-}$  and (C)  $[\text{Ru}(\text{NH}_3)_6]^{3+}$  at different rotational speeds. (B) and (D) represent the corresponding Koutecky- Levich plots.



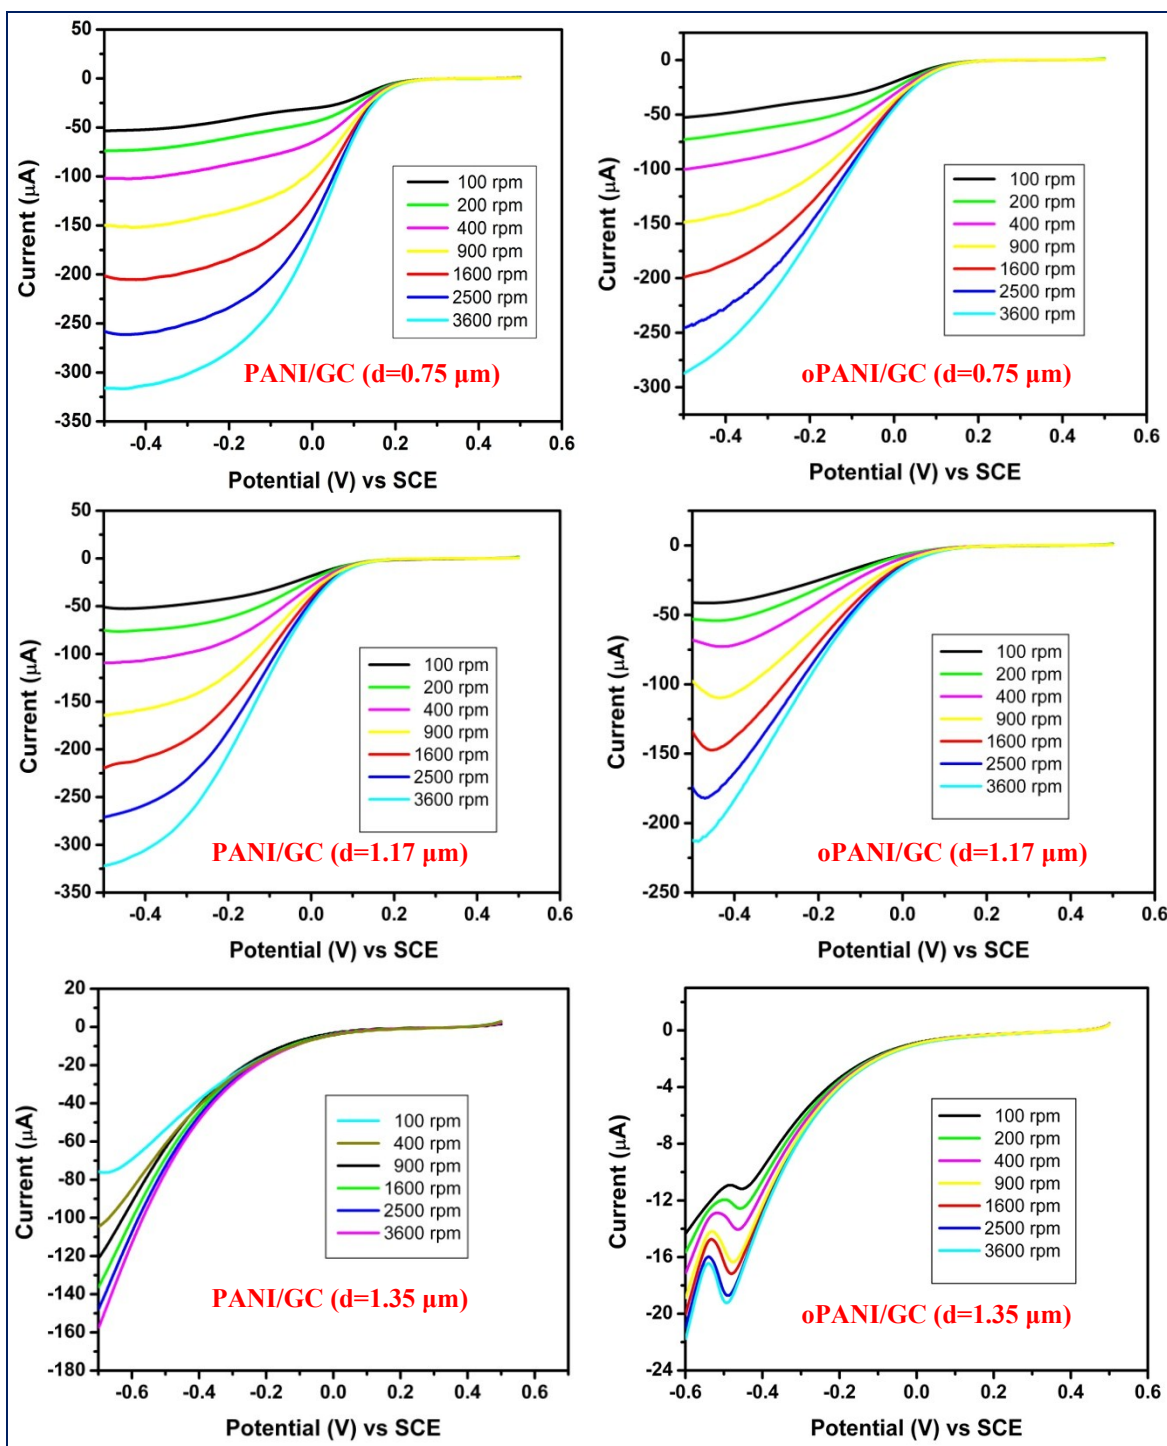

**Fig. S8** RDE linear sweep voltammograms of  $[\text{Fe}(\text{CN})_6]^{3-}$  at PANI/GC and oPANI/GC for various film thickness at different rotation speeds.

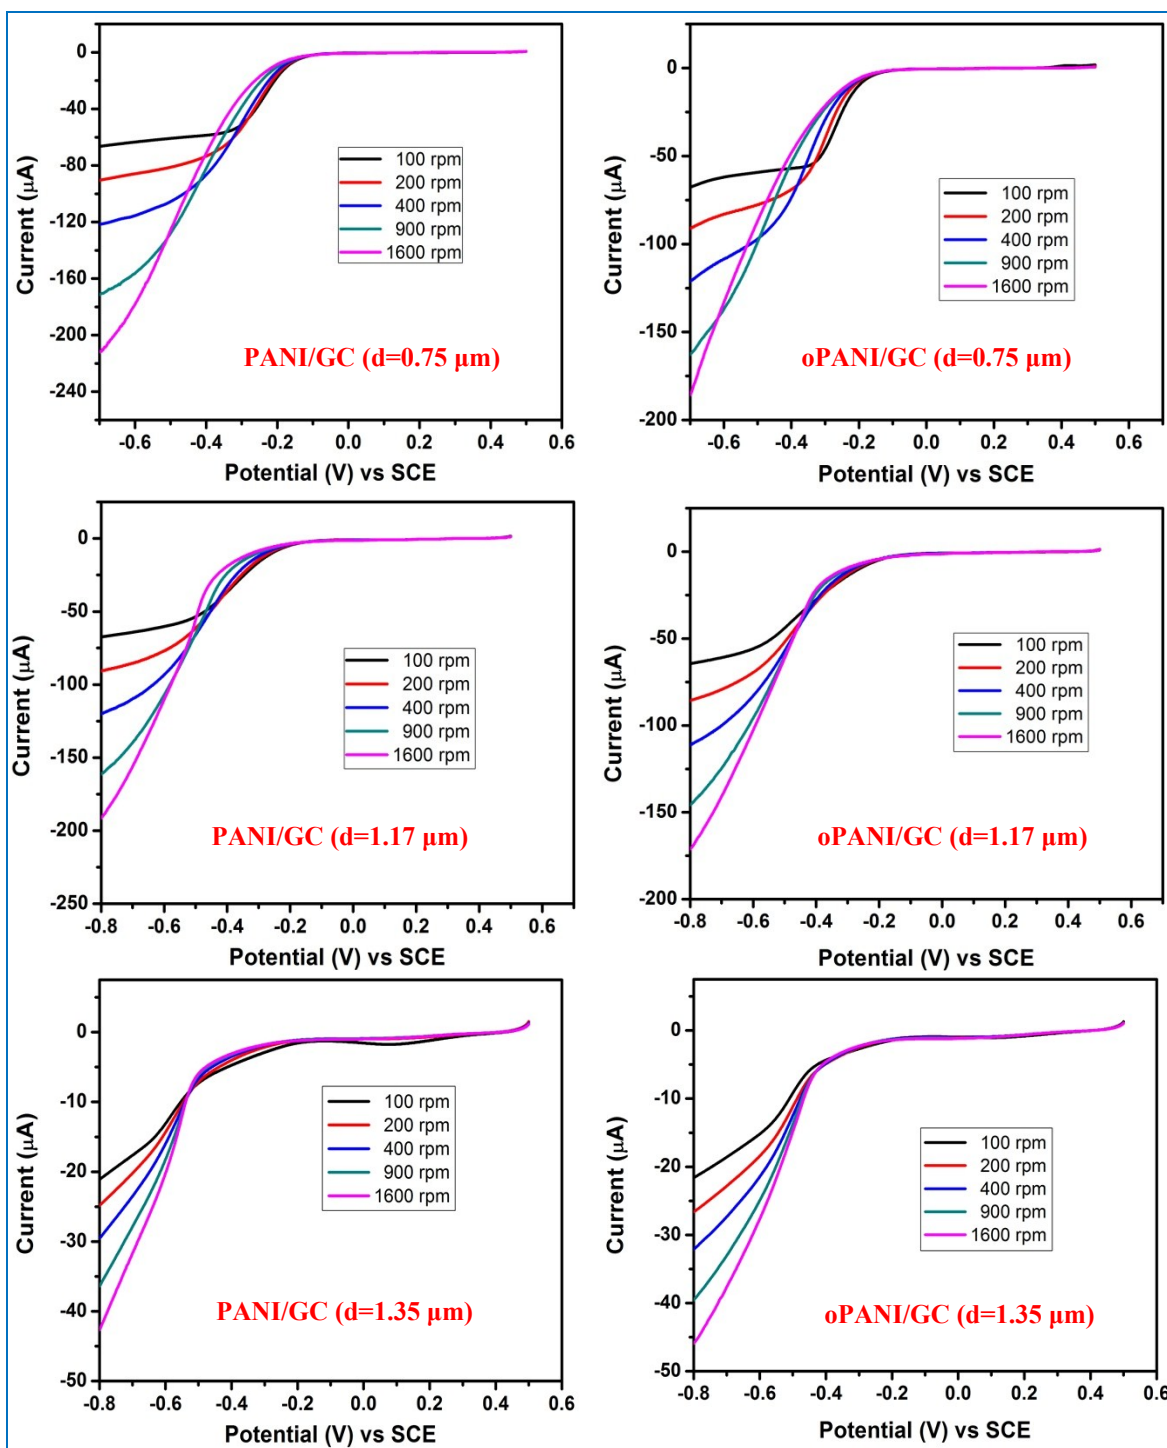

**Fig. S9** RDE linear sweep voltammograms of  $[\text{Ru}(\text{NH}_3)_6]^{3+}$  at PANI/GC and oPANI/GC for various film thickness at different rotation speeds.
